# Supplementary material
Source: Springer Nature journal article supplement (https://www.springermedizin.de/resource/supplementary/12968_2009_510_MOESM5_ESM.pdf/9579140)

Patient # 35

Male

63 yrs

CAD 3- vessel disease

ASI 1.9

PROCAM Score 64

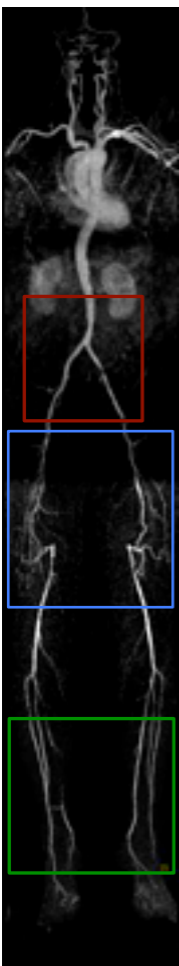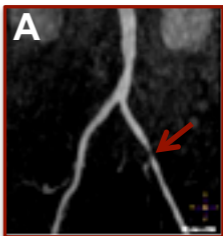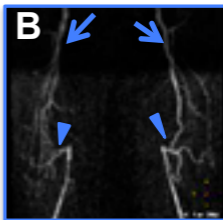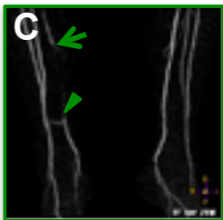

Supplement: MOESM5 [file 9579140]
